# Supplementary material for: Distinct compositional alterations in plasma lipoproteins in type 2 diabetes: a cross-sectional study of healthy individuals and diabetics with and without cardiovascular comorbidities
Source: Research Square preprint supplement (doi:10.21203/rs.3.rs-7318923/v1), 2025-08-18

**Supplementary Figure 1** - Blood plasma lipoproteins differentiating healthy individuals (HC,  $N = 393$ ) from patients with Type 2 Diabetes Mellitus (T2DM) subgroups including diabetic patients without hypertension or coronary heart disease (DO,  $N = 88$ ), diabetic patients with hypertension (DH,  $N = 105$ ), and diabetic patients with both hypertension and coronary heart disease (DHC,  $N = 197$ ) as well as between the subgroups themselves. **A:** Scatter plot of adjusted odds ratios versus mean fold changes (FC) between the two groups. Each dot represents a lipoprotein variable, with dot size proportional to its effect size (%) as determined by multiple linear regression (MLR) analysis after adjusting for confounders. Odds ratios were obtained from logistic regression analysis (LRA). Lipoprotein names are shown only for variables that met the significance threshold ( $P < 0.05$  after false discovery rate (5%) correction) in both LRA and MLR analyses. The color code insert indicates whether lipoprotein molecules are free in blood plasma or belong to one of the four major (sub)fractions: VLDL, IDL, LDL, or HDL. **B:** Results from partial least squares-discriminant analysis (PLS-DA) used to identify key lipoprotein classifiers distinguishing the two groups. Normalized variable importance in projection (VIP) scores and the selectivity ratio plot highlight lipoprotein variables consistently selected during iterative PLS-DA model optimization. 1 - Specificity versus Sensitivity plot shows the area under the curve (AUC) of the receiver operating characteristic curve from the optimized PLS-DA model, developed using a training set (TR – 70% of individuals from both groups) and tested on a test set (TS – 30%). LV = number of latent variables used to build the model; Error% = misclassification rate for TR and TS. The lower-right panel shows results of a permutation test (2,000).

# DO versus HC

A

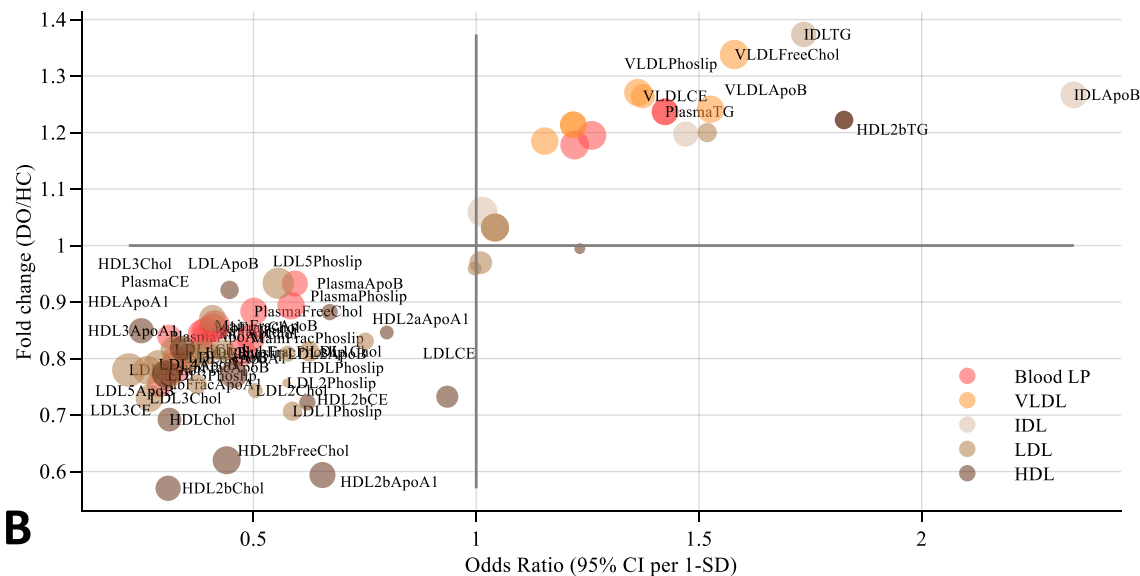

B

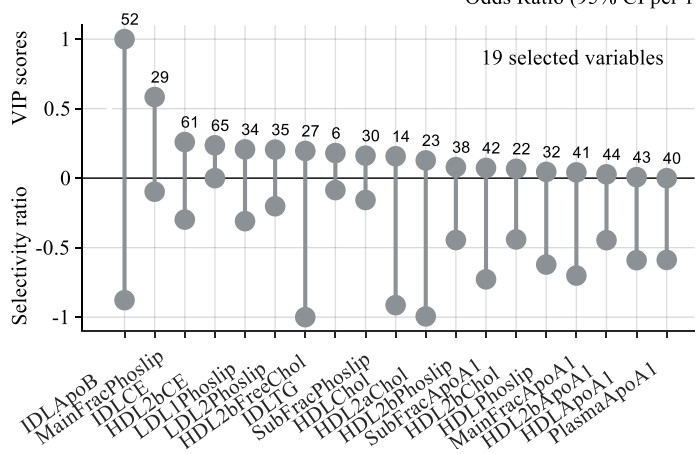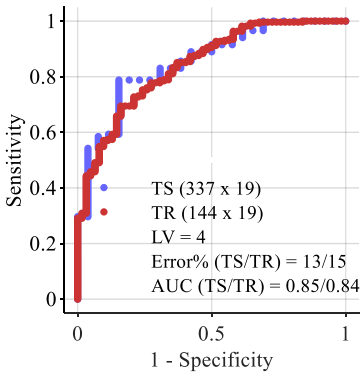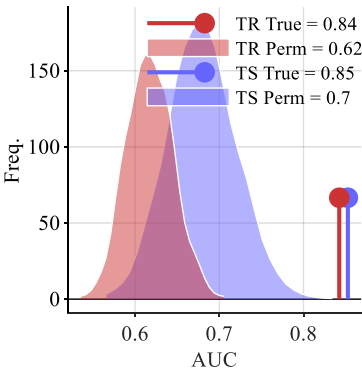

# DH versus HC

A

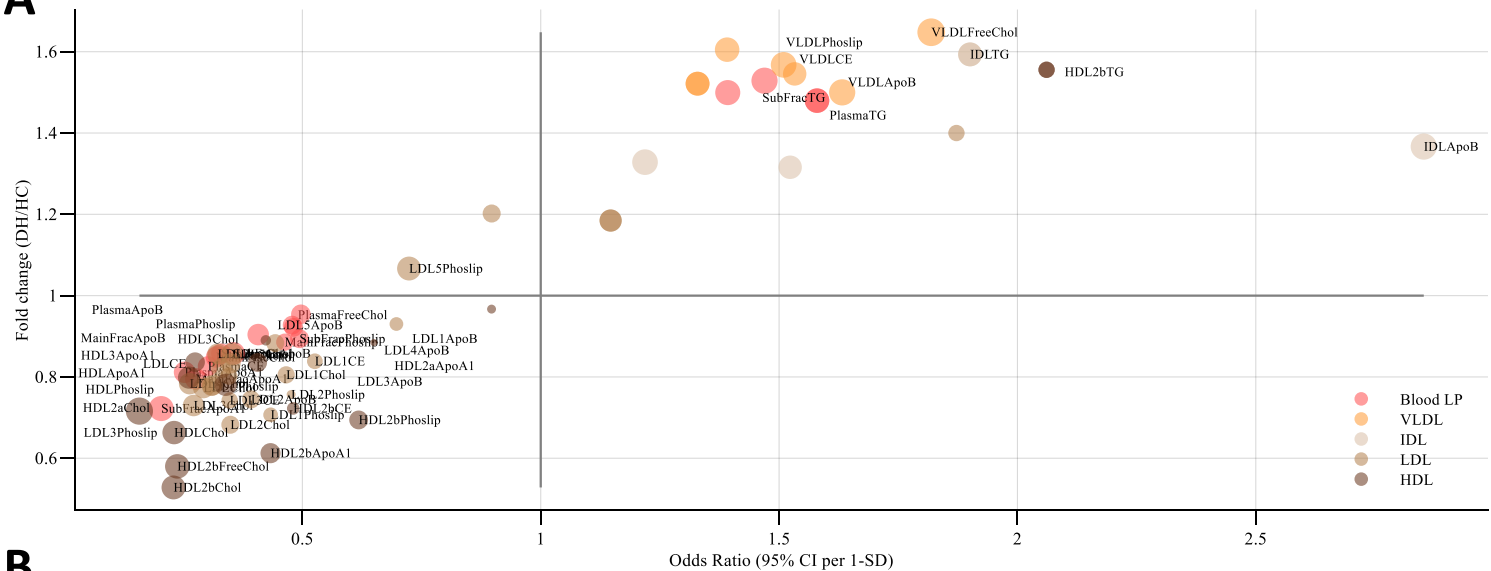

B

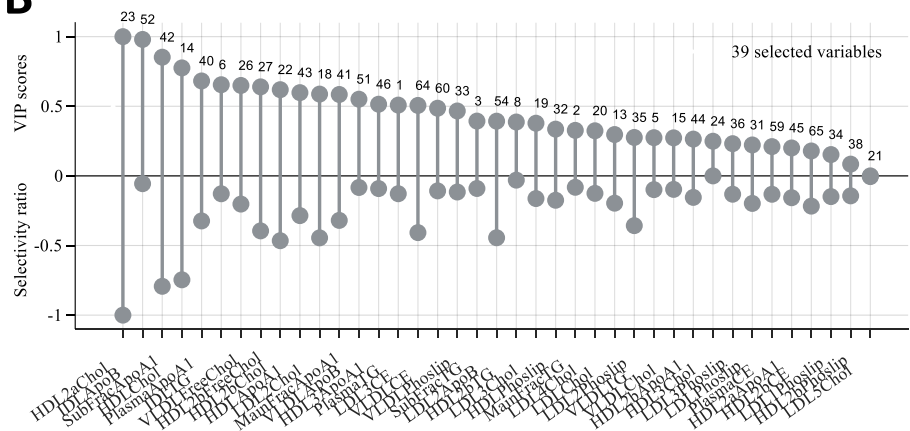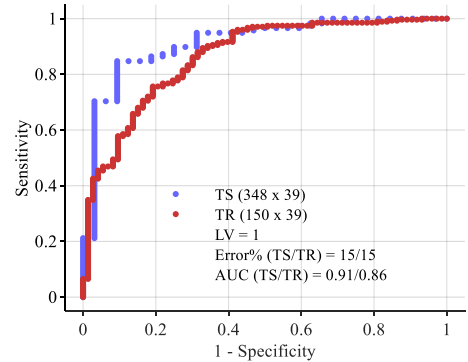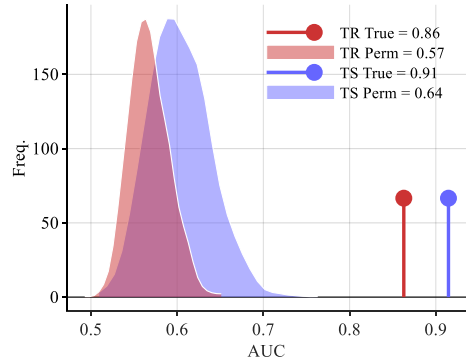

# DHC versus HC

A

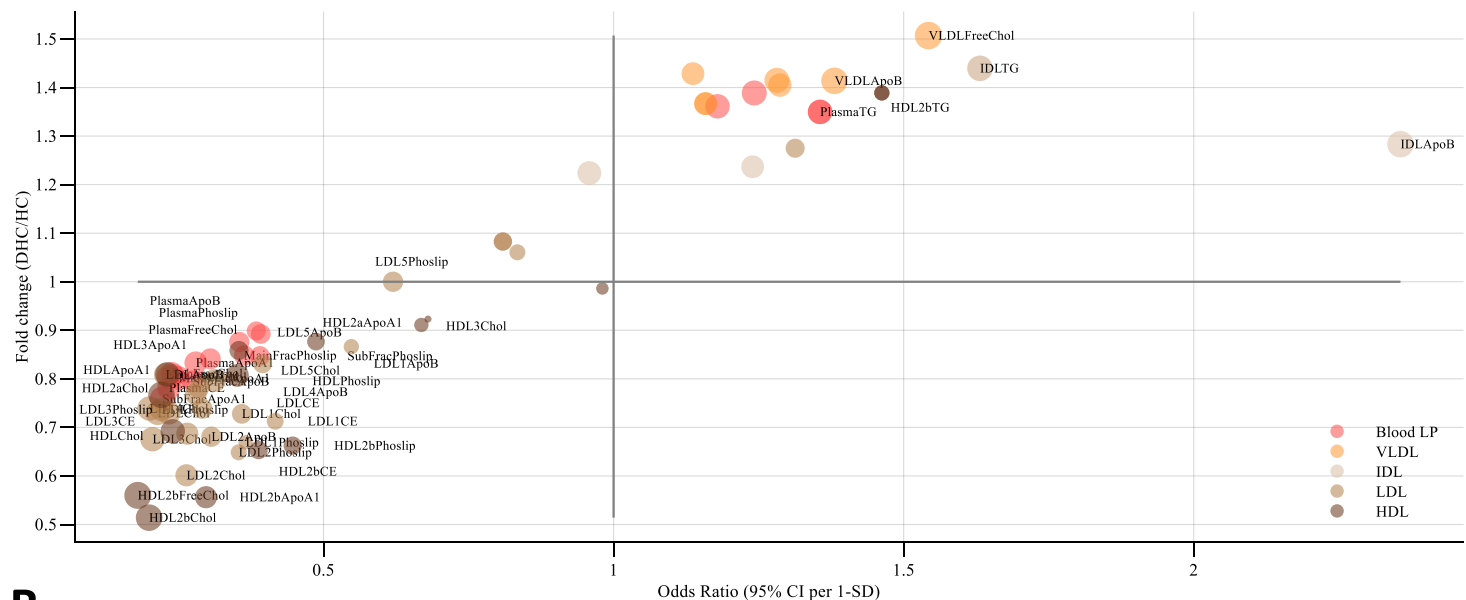

B

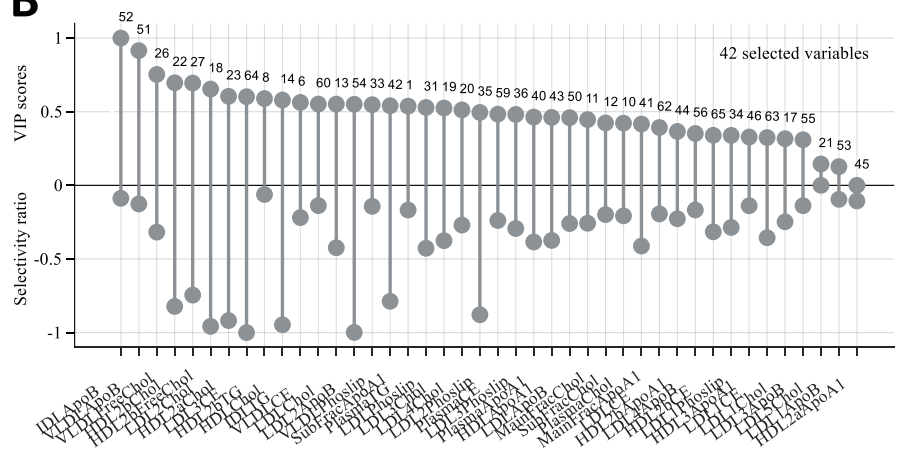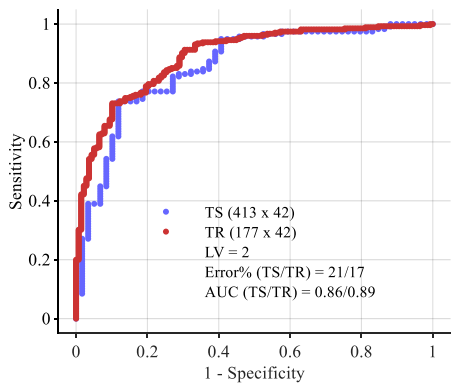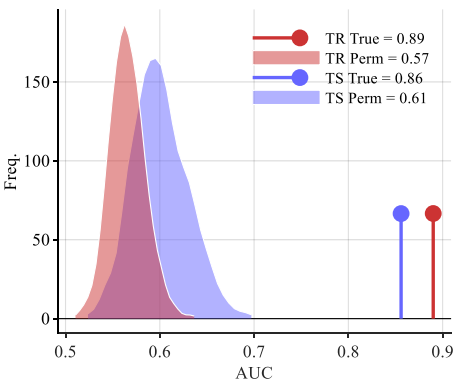

# DH versus DO

A

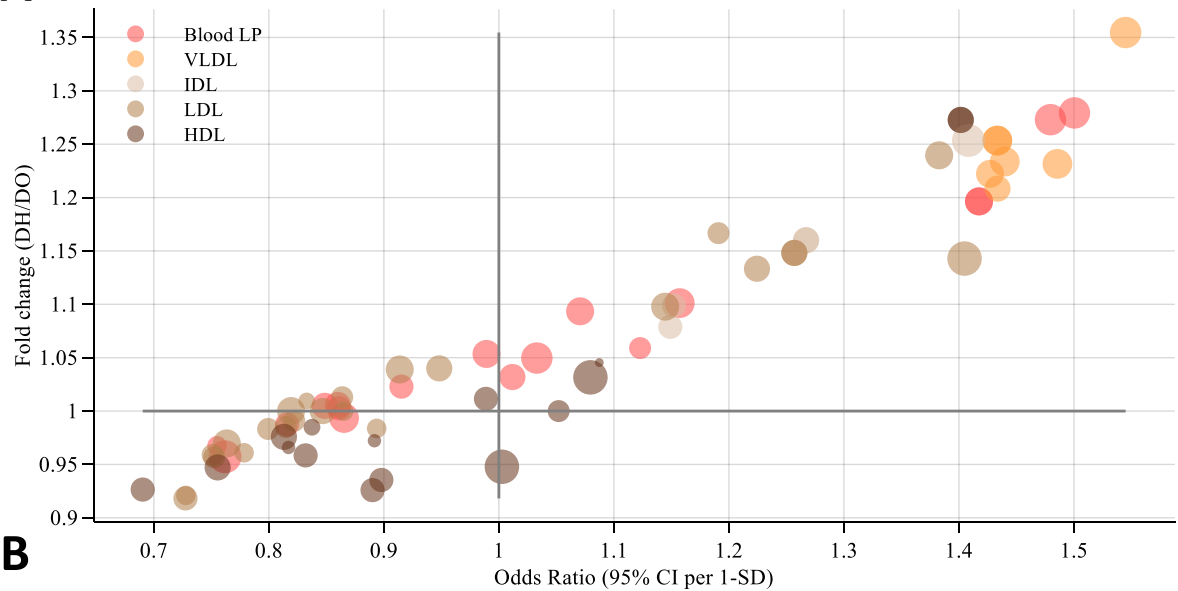

B

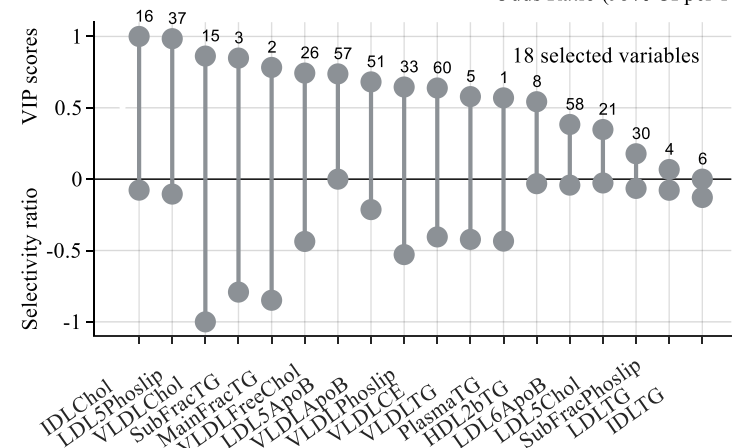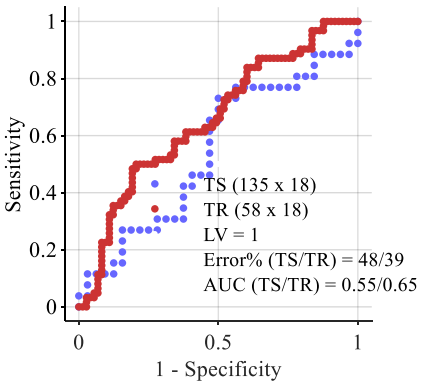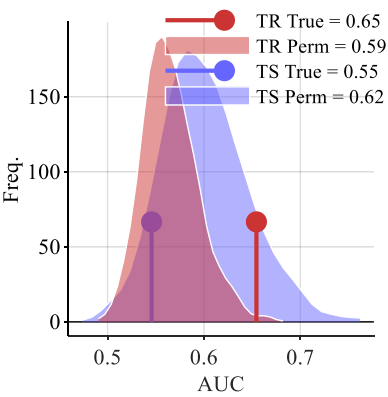

## DHC versus DO

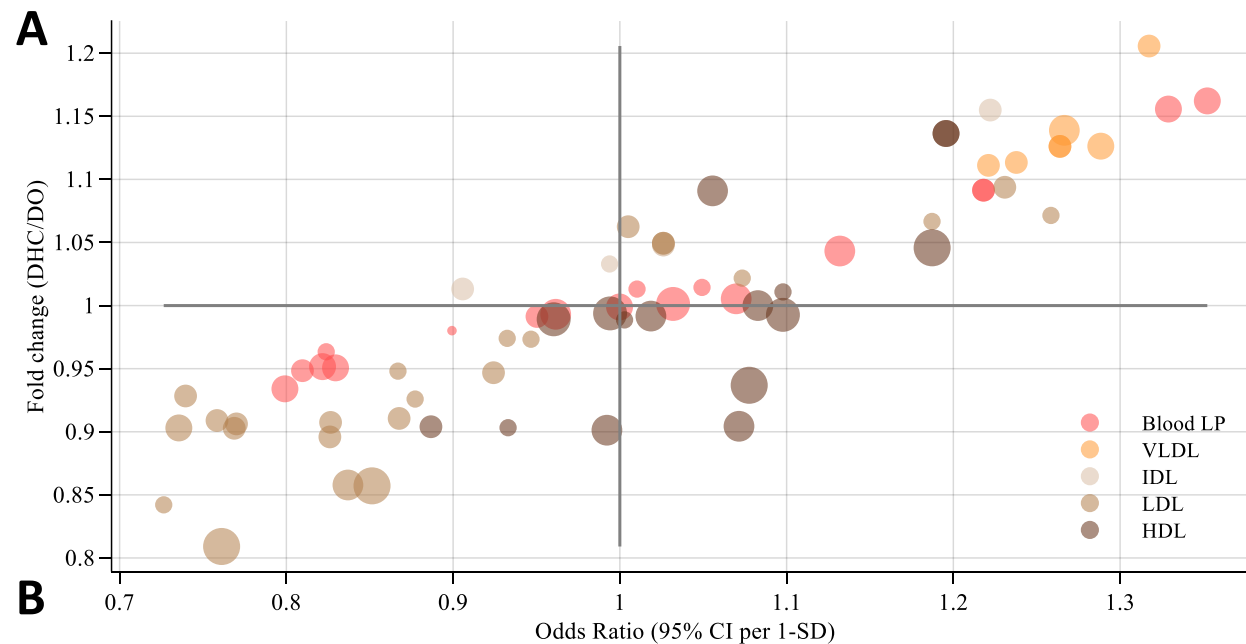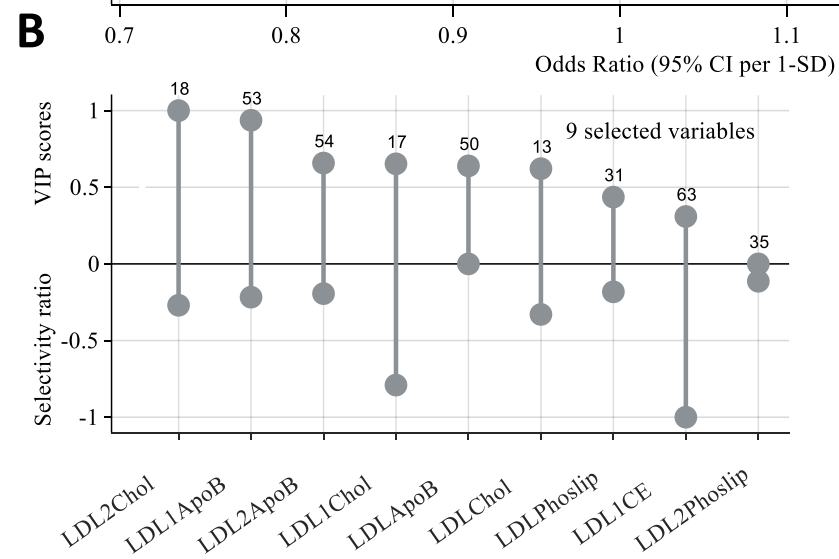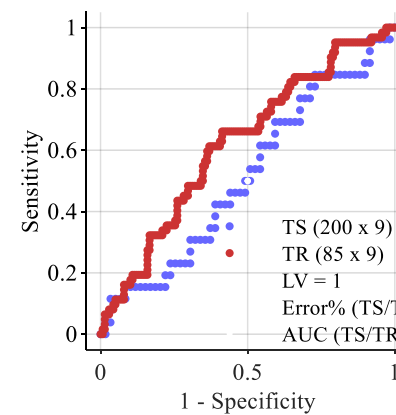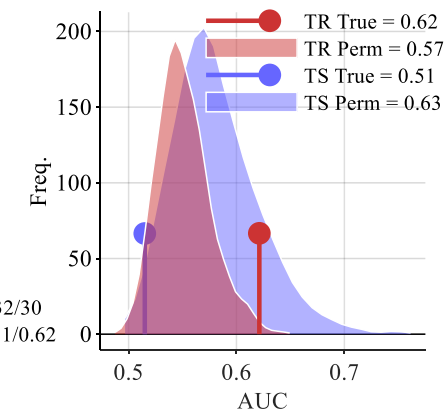

## DHC versus DH

**A**

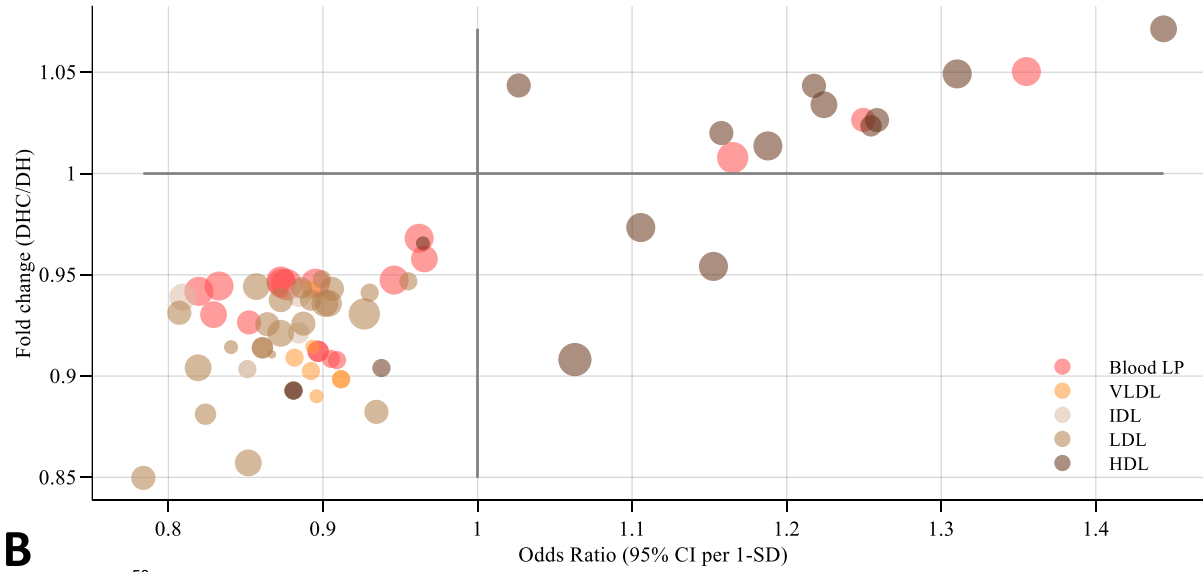

# B

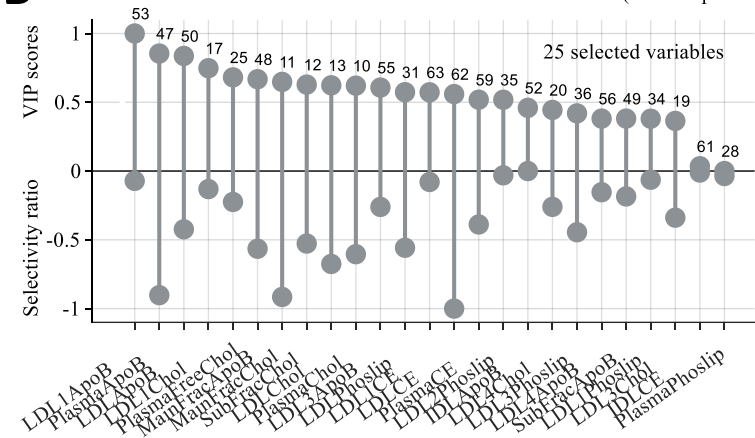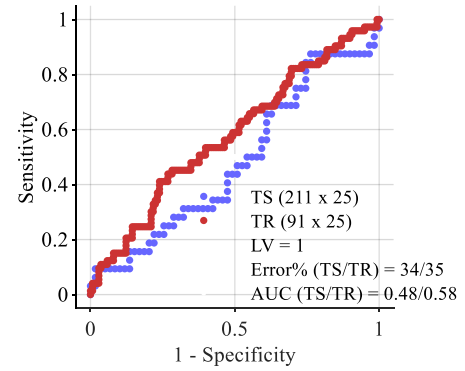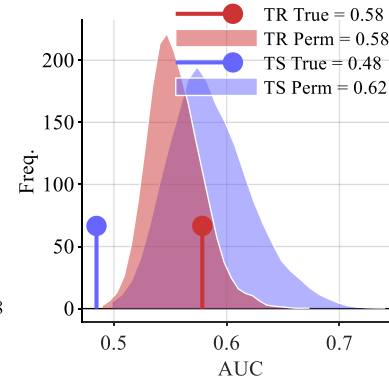

Supplement: Supplementary file 3 [file bab21db2d3bb49bea6717a60.pdf]
