# Supplementary material for: Distinct compositional alterations in plasma lipoproteins in type 2 diabetes: a cross-sectional study of healthy individuals and diabetics with and without cardiovascular comorbidities
Source: Research Square preprint supplement (doi:10.21203/rs.3.rs-7318923/v1), 2025-08-18
Supplement: Supplementary file 1 [file 2e6a35b9e359ea18f8f22356.xlsx]

## Sheet: Supplementary Table 1
Supplementary Table 1 – Concentrations of LPs (mg/dL) in Healthy Control Individuals and Patients with Type 2 Diabetes Mellitus (T2DM). The table presents LP concentrations in healthy control individuals (HC, N = 393), all patients with T2DM (DA, N = 393), diabetic patients without hypertension or coronary heart disease (DO, N = 88), diabetic patients with hypertension (DH, N = 105), and diabetic…
		Healthy Control (HC, N = 393) versus all T2DM diagnosed patients (DA , N = 390)												Healthy Control (HC, N = 393) versus T2DM diagnosed patients without hypertension or CHD (DO, N = 88), T2DM diagnosed patients with hypertension, (DH, N = 105), and T2DM diagnosed patients with hypertension and CHD( DHC, N = 197) groups
		Difference between HC and DA groups						Adjusted for condounders in MLR analysis						Difference between HC and three diabetic subgroups (DO, DH, and DHC)																		Adjusted for condounders in MLR analysis
No.	Lipoproteins	HC, mean (±)	DA, mean (±)	P	Effect size (%)	FC(DA/HC)	OR(DA-HC)	Age	Gender	BMI	SB	DB	Alcohol	HC, mean (±)	DO, mean (±)	DH, mean (±)	DHC, mean (±)	P	Effect size (%)	FC(DO/HC)	FC(DH/HC)	FC(DHC/HC)	FC(DH/DO)	FC(DHC/DO)	FC(DHC/DH)	OR(DO-HC)	OR(DH-HC)	OR(DHC-HC)	OR(DH-DO)	OR(DHC-DO)	OR(DHC-DH)	Age	Gender	BMI	SB	DB	Med.	Hyp.	Llow.	Anhyp.
1	PlasmaTG	113.2 (±52.9)	153.9 (±72.7)	a	19.3	1.36	1.54*	+		+				113.2 (±52.9)	140 (±68)	167.5 (±82.2)	152.8 (±68.3)	a,b,c	20.4	1.24	1.48	1.35	1.2	1.09	0.91	1.23	0.59	1.21	1.31	1.23	0.96	+		+			+
2	MainFracTG	90.5 (±52.2)	122.8 (±68.2)	a	18.8	1.36	1.31*	+		+				90.5 (±52.2)	106.6 (±62)	135.7 (±76.8)	123.2 (±64.7)	b,c,d	19.4	1.18	1.5	1.36	1.27	1.16	0.91	1.14	0.54	1.11	1.38	1.32	0.95	+		+
3	SubFracTG	87.2 (±49.9)	120.6 (±65.9)	a	19.9	1.38	1.39*	+		+				87.2 (±49.9)	104.2 (±59.6)	133.3 (±73.8)	121.1 (±62.8)	b,c,d	20.2	1.19	1.53	1.39	1.28	1.16	0.91	1.22	0.62	1.19	1.41	1.33	0.94	+		+
4	LDLTG	15.7 (±5.8)	17.2 (±7.5)		10.1	1.1	0.94	+		+				15.7 (±5.8)	16.2 (±8)	18.6 (±8)	17 (±6.9)	b	11.2	1.03	1.18	1.08	1.15	1.05	0.91	0.79	0.38*	0.73*	1.21	1.04	0.9	+		+
5	VLDLTG	72.5 (±45)	99.6 (±59.8)	a	16.5	1.37	1.29*	+		+				72.5 (±45)	88 (±53.9)	110.3 (±68.8)	99.1 (±56.4)	b,c	17.6	1.21	1.52	1.37	1.25	1.13	0.9	1.08	0.49*	1.07	1.32	1.27	0.96	+		+
6	IDLTG	9.1 (±4.6)	13.3 (±6.9)	a	21.1	1.46	1.81*	+		+				9.1 (±4.6)	12.5 (±7.3)	14.5 (±7.9)	13.1 (±6)	a,b,c	22.6	1.37	1.59	1.44	1.16	1.05	0.9	1.41	0.62	1.39*	1.17	1.05	0.93	+		+			+
7	LDL1TG	4 (±2.1)	5.2 (±2.9)		11.1	1.3	1.44*	+		+				4 (±2.1)	4.8 (±3.1)	5.6 (±3.2)	5.1 (±2.6)	b,c	11.3	1.2	1.4	1.28	1.17	1.06	0.91	1.29	0.99	1.25	1.16	1.01	0.9	+		+
8	HDL2bTG	1.8 (±1.1)	2.5 (±1.7)	a	7.5	1.39	1.73*	+	+					1.8 (±1.1)	2.2 (±1.7)	2.8 (±1.8)	2.5 (±1.6)	b,c,d	7.8	1.22	1.56	1.39	1.27	1.14	0.89	1.55*	1.36	1.39*	1.31	1.15	0.9	+	+
9	HDL2aTG	2.6 (±1.7)	2.3 (±1.4)		1.5	0.88	0.74*	+						2.6 (±1.7)	2.2 (±1.4)	2.3 (±1.4)	2.4 (±1.5)		1.7	0.85	0.88	0.92	1.05	1.09	1.04	0.78	0.44*	0.55*	1.05	1.07	1.13	+
10	PlasmaChol	183.9 (±46.2)	152.4 (±40.7)	a	15.5	0.83	0.35*	+						183.9 (±46.2)	156 (±38)	156.9 (±43.8)	148.3 (±39.9)	a,b,c	17.5	0.85	0.85	0.81	1.01	0.95	0.95	0.42*	0.17*	0.2*	0.82	0.87	0.97	+					+
11	MainFracChol	168.9 (±42.2)	139.3 (±37.3)	a	16.2	0.82	0.34*	+						168.9 (±42.2)	142.6 (±35)	143.3 (±40.5)	135.7 (±36.3)	a,b,c	18	0.84	0.85	0.8	1	0.95	0.95	0.42*	0.19*	0.2*	0.82	0.86	0.95	+	+				+
12	SubFracChol	176.8 (±43.1)	147.4 (±38.9)	a	15.3	0.83	0.35*	+						176.8 (±43.1)	151.2 (±36.7)	151.6 (±41.8)	143.4 (±38)	a,b,c	17.4	0.86	0.86	0.81	1	0.95	0.95	0.42*	0.19*	0.2*	0.82	0.85	0.96	+					+
13	LDLChol	103.1 (±31.3)	78.2 (±29.7)	a	17	0.76	0.33*	+						103.1 (±31.3)	83.3 (±29.3)	79.7 (±33.1)	75.2 (±27.7)	a,b,c	17.8	0.81	0.77	0.73	0.96	0.9	0.94	0.48*	0.19*	0.19*	0.76	0.8	0.93	+
14	HDLChol	38.3 (±12)	26.2 (±9.2)	a	22.5	0.68	0.28*		+	+				38.3 (±12)	26.5 (±9.7)	25.4 (±8.8)	26.5 (±9.1)	a,b,c	20.6	0.69	0.66	0.69	0.96	1	1.04	0.3*	0.19*	0.23*	0.82	1.08	1.33*		+	+
15	VLDLChol	11.9 (±8.6)	16.9 (±11.2)		16.9	1.42	1.25*	+		+				11.9 (±8.6)	14.1 (±10.3)	19.1 (±12.3)	17 (±10.7)	b,c	17.3	1.18	1.61	1.43	1.35	1.21	0.89	1.14	0.55	1.1	1.46*	1.29	0.94	+		+
16	IDLChol	6.7 (±3.6)	8.1 (±4)		18.4	1.21	1.07	+		+				6.7 (±3.6)	7.1 (±3.9)	8.9 (±4)	8.2 (±4)	b,c	18.7	1.06	1.33	1.22	1.25	1.15	0.92	0.98	0.55	0.95	1.35	1.19	0.92	+		+
17	LDL1Chol	27.2 (±10.8)	20.9 (±10.9)	a	11.6	0.77	0.52*	+						27.2 (±10.8)	22.1 (±11)	21.9 (±11.9)	19.8 (±10.3)	a,b,c	13.1	0.81	0.81	0.73	0.99	0.9	0.9	0.86	0.33*	0.34*	0.87	0.85	0.84	+	+
18	LDL2Chol	14.8 (±6.3)	9.7 (±5.7)	a	15.3	0.66	0.41*							14.8 (±6.3)	11 (±5.4)	10.1 (±6.5)	8.9 (±5.4)	a,b,c,e	17.1	0.74	0.68	0.6	0.92	0.81	0.88	0.68	0.22*	0.24*	0.74	0.75	0.88
19	LDL3Chol	14.8 (±5.6)	10.4 (±4.8)	a	18.3	0.7	0.3*	+						14.8 (±5.6)	10.8 (±4.8)	10.8 (±5.2)	10 (±4.6)	a,b,c	17.9	0.73	0.73	0.68	1	0.93	0.93	0.39*	0.16*	0.19*	0.88	0.89	0.92	+
20	LDL4Chol	15.7 (±4.9)	12.1 (±4.3)	a	17.2	0.77	0.29*	+		+				15.7 (±4.9)	12.8 (±4.4)	12.3 (±4.6)	11.6 (±4)	a,b,c	17.6	0.82	0.78	0.74	0.96	0.91	0.94	0.38*	0.19*	0.18*	0.76	0.81	0.97	+		+
21	LDL5Chol	11.8 (±4.6)	9.5 (±3.9)	a	15.7	0.81	0.36*	+	+	+				11.8 (±4.6)	9.2 (±3.5)	10.1 (±4.2)	9.4 (±3.9)	a,b,c	13.9	0.78	0.86	0.8	1.1	1.02	0.93	0.25*	0.17*	0.35*	1.1	1.08	0.96	+		+
22	HDL2bChol	14.2 (±7.2)	7.5 (±5.1)	a	24.6	0.53	0.3*		+	+				14.2 (±7.2)	8.1 (±5.2)	7.5 (±5.5)	7.3 (±4.9)	a,b,c	23	0.57	0.53	0.51	0.93	0.9	0.97	0.22*	0.25*	0.18*	0.89	1.04	1.17		+	+
23	HDL2aChol	17.6 (±3.8)	13.3 (±3.3)	a	28	0.76	0.25*		+	+				17.6 (±3.8)	13.6 (±3.3)	12.6 (±3.5)	13.5 (±3.2)	a,b,c,f	24.7	0.77	0.72	0.77	0.93	0.99	1.07	0.21*	0.14*	0.19*	0.68*	1.15	1.65*		+	+
24	HDL3Chol	19.1 (±3.4)	17.3 (±4.1)	a	6.5	0.91	0.59*	+						19.1 (±3.4)	17.6 (±3.8)	17 (±4.3)	17.4 (±4.1)	b,c	7.1	0.92	0.89	0.91	0.97	0.99	1.02	0.34*	0.11*	0.59*	0.68*	1.08	1.53*	+					+
25	PlasmaFreeChol	52.4 (±11.5)	46.7 (±11.1)	a	11.6	0.89	0.47*	+						52.4 (±11.5)	46.3 (±10.4)	48.6 (±11.8)	45.9 (±10.9)	a,b,c	13.1	0.88	0.93	0.88	1.05	0.99	0.94	0.58*	0.2*	0.31*	1.02	0.96	0.89	+	+
26	VLDLFreeChol	7.1 (±4)	10.7 (±5.2)	a	26.5	1.51	1.76*	+		+				7.1 (±4)	9.5 (±5)	11.7 (±5.8)	10.7 (±5)	a,b,c	26.5	1.34	1.65	1.51	1.23	1.13	0.91	1.46	0.88	1.41*	1.39	1.27	0.93	+	+	+
27	HDL2bFreeChol	5 (±2.1)	2.9 (±1.6)	a	25.4	0.58	0.29*		+	+				5 (±2.1)	3.1 (±1.9)	2.9 (±1.7)	2.8 (±1.5)	a,b,c	25.3	0.62	0.58	0.56	0.94	0.9	0.97	0.44*	0.28*	0.15*	0.93	0.93	0.99		+	+
28	PlasmaPhoslip	203.6 (±45.2)	183.4 (±45.2)	a	10.6	0.9	0.5*	+						203.6 (±45.2)	181.9 (±38.9)	187.7 (±50.1)	181.7 (±45.1)	a,b,c	13.3	0.89	0.92	0.89	1.03	1	0.97	0.46*	0.16*	0.32*	0.91	1.05	1.11	+	+				+
29	MainFracPhoslip	166.1 (±43.8)	142.1 (±45.7)	a	11.7	0.86	0.45*	+						166.1 (±43.8)	138.9 (±41.2)	147.1 (±49.4)	140.9 (±45.5)	a,b,c	12.8	0.84	0.89	0.85	1.06	1.01	0.96	0.33*	0.16*	0.3*	1.03	1.1	1.1	+	+				+
30	SubFracPhoslip	151 (±47.2)	128.6 (±46.7)	a	11.8	0.85	0.48*	+						151 (±47.2)	122.6 (±43.2)	135 (±50.3)	127.9 (±45.9)	a,b,c	12.2	0.81	0.89	0.85	1.1	1.04	0.95	0.39*	0.16*	0.33*	1.09	1.15	1.05	+	+				+
31	LDLPhoslip	69.1 (±21.3)	52.8 (±20.7)	a	14.8	0.76	0.34*	+						69.1 (±21.3)	56 (±19.9)	53.7 (±23.3)	50.9 (±19.4)	a,b,c	15.8	0.81	0.78	0.74	0.96	0.91	0.95	0.46*	0.19*	0.19*	0.76	0.79	0.95	+	+
32	HDLPhoslip	67.9 (±18.1)	53.8 (±17.2)	a	20.3	0.79	0.41*		+					67.9 (±18.1)	52.4 (±17.3)	53 (±17.7)	54.8 (±16.9)	a,b,c	18.8	0.77	0.78	0.81	1.01	1.05	1.03	0.26*	0.15*	0.3*	0.94	1.25	1.42*		+	+			+
33	VLDLPhoslip	22.9 (±13.4)	32.6 (±17.2)	a	21	1.42	1.47*	+		+				22.9 (±13.4)	29.1 (±16.2)	35.9 (±19.2)	32.4 (±16.3)	a,b,c	21.8	1.27	1.57	1.41	1.23	1.11	0.9	1.21	0.62	1.15	1.33	1.24	0.95	+		+			+
34	LDL1Phoslip	13.3 (±8.8)	9.1 (±6.5)	a	7.6	0.68	0.52*	+						13.3 (±8.8)	9.4 (±6.3)	9.4 (±7.9)	8.9 (±5.8)	a,b,c	7.5	0.71	0.71	0.67	1	0.95	0.95	0.84	0.26*	0.34*	0.83	0.92	1.01	+
35	LDL2Phoslip	7.4 (±3.9)	5.2 (±3.3)	a	7.7	0.7	0.52*							7.4 (±3.9)	5.6 (±3.2)	5.6 (±3.9)	4.8 (±3)	b,c	8.8	0.76	0.76	0.65	1	0.86	0.86	0.99	0.39*	0.35*	0.86	0.79	0.88	+
36	LDL3Phoslip	10 (±3.3)	7.5 (±3)	a	17	0.75	0.33*	+		+				10 (±3.3)	7.7 (±2.9)	7.8 (±3.3)	7.3 (±2.9)	a,b,c	16.8	0.77	0.78	0.73	1.01	0.95	0.94	0.36*	0.18*	0.22*	0.85	0.89	0.95	+		+
37	LDL5Phoslip	7.5 (±2.7)	7.5 (±2.7)	a	11.9	1	0.69*	+	+	+				7.5 (±2.7)	7 (±2.4)	8 (±2.7)	7.5 (±2.7)		11.9	0.93	1.07	1	1.14	1.07	0.94	0.63	0.24*	0.65*	1.34	1.22	0.91	+		+
38	HDL2bPhoslip	15.7 (±11.2)	10.8 (±9.1)	a	12	0.69	0.67*		+	+				15.7 (±11.2)	11.5 (±9.9)	10.9 (±10.1)	10.4 (±8.1)	a,b,c	12.4	0.73	0.69	0.66	0.95	0.9	0.95	0.8	0.57	0.31*	1.01	1.11	1.33		+	+
39	HDL2aPhoslip	36.2 (±9)	35.6 (±10.7)		3.9	0.98	1.02		+					36.2 (±9)	36 (±9.4)	35 (±11)	35.7 (±11.1)		7.6	0.99	0.97	0.99	0.97	0.99	1.02	0.77	0.33*	0.75	0.78	1.09	1.39*		+				+
40	PlasmaApoA1	121 (±21.7)	100.3 (±20.6)	a	20.4	0.83	0.31*		+					121 (±21.7)	101.5 (±19.1)	98.2 (±22.3)	100.8 (±20.3)	a,b,c	19.4	0.84	0.81	0.83	0.97	0.99	1.03	0.19*	0.1*	0.21*	0.67*	1.04	1.61*		+				+
41	MainFracApoA1	96.2 (±21.7)	76.9 (±17.7)	a	23.1	0.8	0.31*	+	+					96.2 (±21.7)	77 (±18.3)	76.5 (±17.2)	77.1 (±17.7)	a,b,c	21.6	0.8	0.8	0.8	0.99	1	1.01	0.23*	0.14*	0.21*	0.83	1.08	1.33*	+	+
42	SubFracApoA1	99 (±24.8)	74 (±18.4)	a	27.7	0.75	0.26*		+					99 (±24.8)	74.7 (±18.7)	71.5 (±17.2)	75.1 (±18.9)	a,b,c	24.4	0.75	0.72	0.76	0.96	1.01	1.05	0.25*	0.21*	0*	0.73	1.13	1.55*		+
43	HDLApoA1	101.2 (±21.4)	81.8 (±17.3)	a	23.6	0.81	0.29*	+	+					101.2 (±21.4)	82.8 (±16.8)	80.8 (±18)	81.9 (±17.3)	a,b,c	22.7	0.82	0.8	0.81	0.98	0.99	1.01	0.21*	0.13*	0.19*	0.75	1.03	1.41*	+	+				+
44	HDL2bApoA1	16 (±9.9)	9.3 (±7.9)	a	18.9	0.58	0.48*		+	+				16 (±9.9)	9.5 (±8.6)	9.8 (±8.9)	8.9 (±7)	a,b,c	18.3	0.59	0.61	0.56	1.03	0.94	0.91	0.57	0.42*	0.21*	1.09	1.11	1.12		+	+
45	HDL2aApoA1	36.5 (±8.2)	31.7 (±7.9)	a	12.7	0.87	0.55*		+					36.5 (±8.2)	32.2 (±7.1)	30.5 (±8)	32 (±8.1)	a,b,c	13.4	0.88	0.84	0.88	0.95	0.99	1.05	0.42*	0.25*	0.35*	0.69*	1.07	1.57*		+				+
46	HDL3ApoA1	54.4 (±11.1)	46.2 (±9.6)	a	15.8	0.85	0.35*			+				54.4 (±11.1)	46.2 (±9.3)	45.5 (±9.3)	46.7 (±10)	a,b,c	12.6	0.85	0.84	0.86	0.98	1.01	1.03	0.23*	0.12*	0.34*	0.71	1.16	1.52*			+
47	PlasmaApoB	93.7 (±21.8)	86.3 (±21)	a	8.9	0.92	0.53*	+		+				93.7 (±21.8)	87.4 (±21.2)	89.4 (±22.1)	84.2 (±20.2)	c	11.4	0.93	0.95	0.9	1.02	0.96	0.94	0.63*	0.28*	0.33*	0.89	0.85	0.88	+		+			+
48	MainFracApoB	76.2 (±22.5)	65.7 (±20.1)	a	12.6	0.86	0.42*	+		+				76.2 (±22.5)	65.4 (±19.8)	68.9 (±21.4)	64.1 (±19.5)	a,b,c	13.5	0.86	0.9	0.84	1.05	0.98	0.93	0.49*	0.23*	0.28*	0.99	0.91	0.86	+		+
49	SubFracApoB	68.2 (±24.7)	55.2 (±20.7)	a	14	0.81	0.38*	+						68.2 (±24.7)	53.5 (±20.7)	58.5 (±21.4)	54.2 (±20.3)	a,b,c	13.6	0.78	0.86	0.79	1.09	1.01	0.93	0.45*	0.21*	0.26*	1.09	1	0.87	+
50	LDLApoB	75.3 (±18.4)	63 (±17.3)	a	15.2	0.84	0.36*	+		+				75.3 (±18.4)	65.6 (±17.4)	64.5 (±18.9)	60.9 (±16.1)	a,b,c	16.9	0.87	0.86	0.81	0.98	0.93	0.94	0.46*	0.23*	0.21*	0.8	0.77	0.89	+		+
51	VLDLApoB	5.8 (±3)	8.1 (±3.5)	a	24	1.4	1.61*	+		+				5.8 (±3)	7.2 (±3.4)	8.7 (±3.7)	8.2 (±3.3)	a,b,c	24.3	1.24	1.5	1.41	1.21	1.14	0.94	1.4	0.86	1.16	1.34	1.25	0.95	+
52	IDLApoB	6 (±1.7)	7.8 (±2.1)	a	27.2	1.3	2.59*	+		+				6 (±1.7)	7.6 (±2.3)	8.2 (±2.2)	7.7 (±2)	a,b,c	27.4	1.27	1.37	1.28	1.08	1.01	0.94	1.92*	1.5	1.88*	1.07	0.94	0.89	+		+			+
53	LDL1ApoB	17.2 (±5.1)	15.5 (±5.7)	a	6.4	0.9	0.73*	+	+					17.2 (±5.1)	16.5 (±5.6)	16 (±6.2)	14.9 (±5.4)	c	9.1	0.96	0.93	0.87	0.97	0.9	0.93	1.22	0.58	0.53*	0.81	0.77	0.85	+	+				+
54	LDL2ApoB	9.4 (±3.3)	6.9 (±3.5)	a	12.6	0.73	0.45*							9.4 (±3.3)	7.6 (±3.2)	7 (±3.9)	6.4 (±3.3)	a,b,c,e	17	0.81	0.74	0.68	0.92	0.84	0.91	0.94	0.39*	0.31*	0.77	0.73	0.85	+							+
55	LDL3ApoB	9.6 (±3.4)	7.7 (±3)	a	13.1	0.8	0.39*	+		+				9.6 (±3.4)	7.7 (±3)	8 (±3.1)	7.5 (±2.9)	a,b,c	13.2	0.8	0.83	0.78	1.04	0.97	0.94	0.5*	0.18*	0.25*	0.93	0.94	0.9	+		+
56	LDL4ApoB	9.5 (±3.2)	7.5 (±2.8)	a	14.9	0.79	0.36*	+		+				9.5 (±3.2)	7.5 (±2.7)	7.8 (±3)	7.3 (±2.6)	a,b,c	14.1	0.79	0.82	0.77	1.04	0.97	0.94	0.38*	0.23*	0.29*	0.94	0.95	0.93	+		+
57	LDL5ApoB	7.7 (±3)	6.4 (±2.7)	a	11.4	0.83	0.44*	+		+				7.7 (±3)	6 (±2.4)	6.8 (±3.2)	6.4 (±2.6)	a,b,c	9.6	0.78	0.88	0.83	1.13	1.07	0.94	0.35*	0.36*	0.45*	1.23	1.16	0.91	+		+
58	LDL6ApoB	9.9 (±8.5)	10.7 (±9)		7.6	1.08	0.9	+	+	+				9.9 (±8.5)	9.6 (±7.1)	11.9 (±10.2)	10.5 (±9.1)		8.3	0.97	1.2	1.06	1.24	1.09	0.88	1.1	0.72	0.84	1.33	1.2	0.96	+	+	+
59	PlasmaCE	219.2 (±56.7)	176.7 (±51.6)	a	16.1	0.81	0.33*	+						219.2 (±56.7)	183.4 (±48.6)	181.1 (±55.3)	171.3 (±50.5)	a,b,c	18.2	0.84	0.83	0.78	0.99	0.93	0.95	0.4*	0.17*	0.19*	0.76	0.84	1	+					+
60	VLDLCE	12.1 (±6.9)	17 (±8.8)	a	19	1.4	1.46*	+		+				12.1 (±6.9)	15.3 (±8.5)	18.7 (±9.5)	17 (±8.3)	a,b,c	19.9	1.26	1.55	1.4	1.22	1.11	0.91	1.22	0.63	1.14	1.32	1.22	0.94	+		+			+
61	IDLCE	7.6 (±2.9)	9.5 (±3.6)	a	17.4	1.25	1.44*	+		+				7.6 (±2.9)	9.1 (±3.8)	10 (±3.4)	9.4 (±3.6)	a,b,c	19	1.2	1.32	1.24	1.1	1.03	0.94	1.22	0.65	1.04	1.06	1.03	0.97	+		+			+
62	LDLCE	107.5 (±39.1)	83 (±36.8)	a	12	0.77	0.4*	+						107.5 (±39.1)	87.5 (±37.1)	86.2 (±39.1)	79.4 (±35.2)	a,b,c	13.2	0.81	0.8	0.74	0.99	0.91	0.92	0.55*	0.2*	0.26*	0.8	0.85	0.93	+
63	LDL1CE	25.4 (±13.1)	19.6 (±12.5)	a	8.3	0.77	0.61*	+						25.4 (±13.1)	21.1 (±12)	21.3 (±14.4)	18.1 (±11.6)	a,b,c	10.6	0.83	0.84	0.71	1.01	0.86	0.85	1.13	0.41*	0.43*	0.86	0.83	0.83	+
64	LDL3CE	16.3 (±5.8)	11.7 (±5.9)	a	14.4	0.72	0.37*							16.3 (±5.8)	12.3 (±6.1)	12.1 (±6.4)	11.2 (±5.4)	a,b,c	14.6	0.75	0.74	0.69	0.98	0.91	0.93	0.44*	0.2*	0.25*	0.9	0.88	0.9								+
65	HDL2bCE	17.3 (±8.4)	11.9 (±7.5)	a	11.7	0.69	0.55*		+					17.3 (±8.4)	12.5 (±7.1)	12.5 (±7.9)	11.3 (±7.6)	a,b,c	12.8	0.72	0.72	0.65	1	0.9	0.9	0.5*	0.38*	0.24*	1.04	0.94	1.01		+
