# Supplementary material for: Distinct compositional alterations in plasma lipoproteins in type 2 diabetes: a cross-sectional study of healthy individuals and diabetics with and without cardiovascular comorbidities
Source: Research Square preprint supplement (doi:10.21203/rs.3.rs-7318923/v1), 2025-08-18

**Supplementary Figure 3** - Disrupted correlation structure of blood plasma lipoproteins in patients with Type 2 Diabetes Mellitus. Scatter plots show the correlation between the concentrations (mg/dL) of specific lipoprotein pairs in healthy controls (HC,  $N = 393$ ), all patients with Type 2 Diabetes Mellitus (DA,  $N = 393$ ), diabetic patients without hypertension or coronary heart disease (DO,  $N = 88$ ), diabetic patients with hypertension (DH,  $N = 105$ ), and diabetic patients with both hypertension and coronary heart disease (DHC,  $N = 197$ ). Each panel displays the Pearson correlation coefficient ( $R$ ), with asterisks (\*) indicating statistically significant correlations ( $P < 0.05$ ) within the respective group.

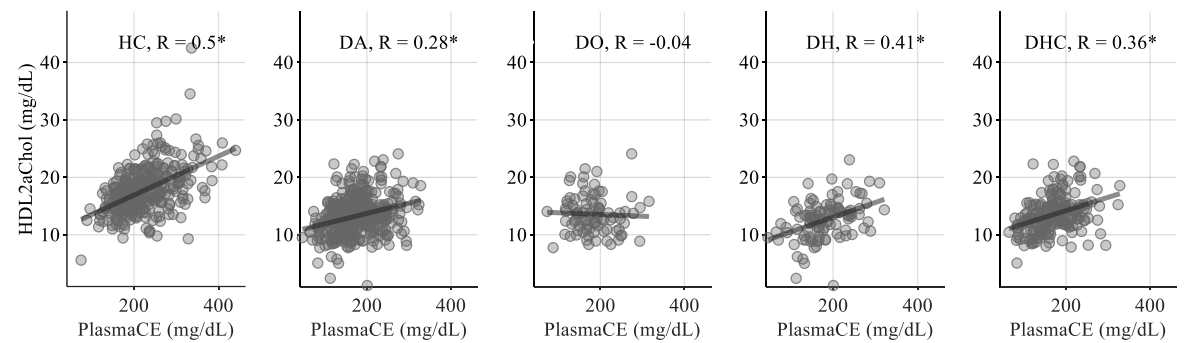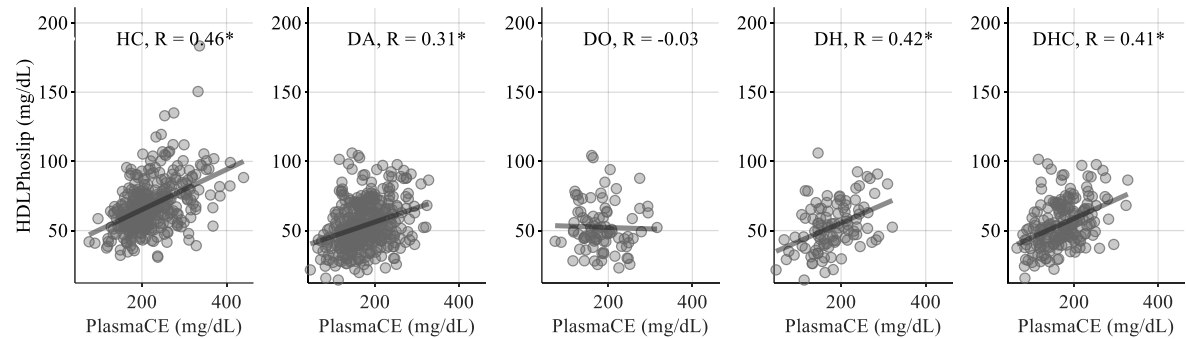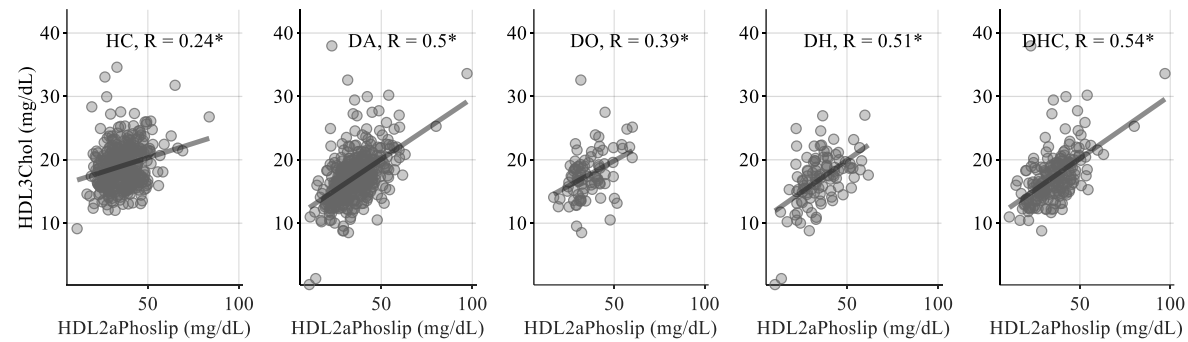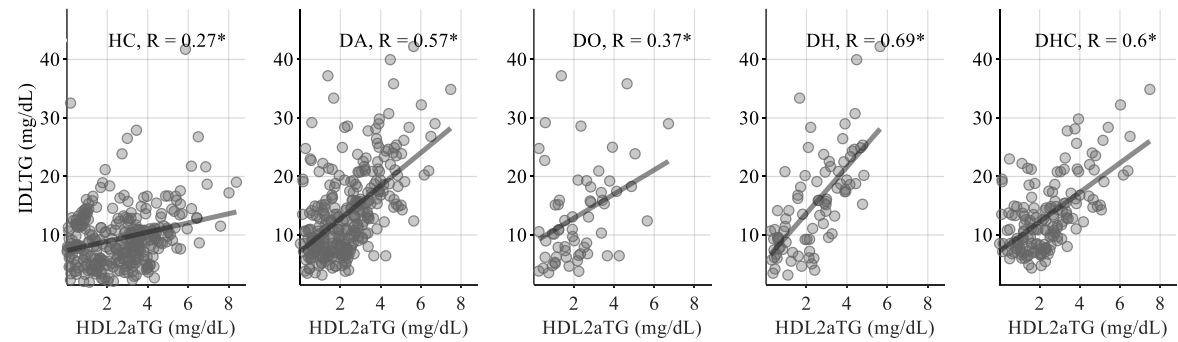

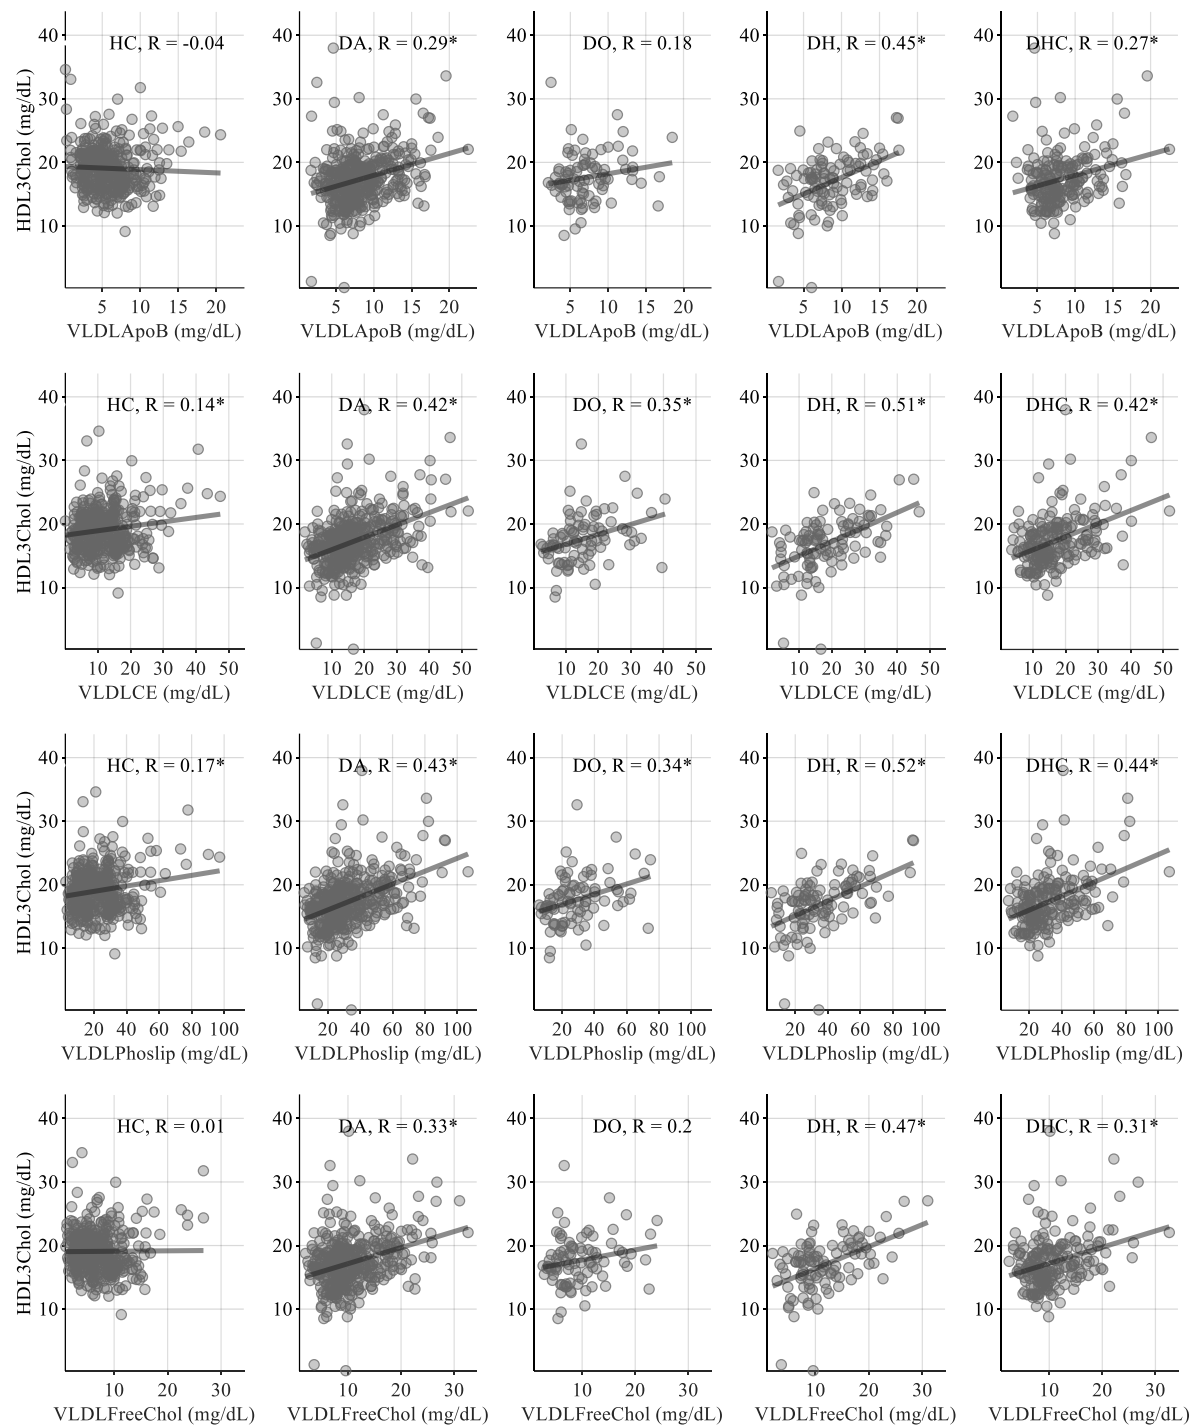

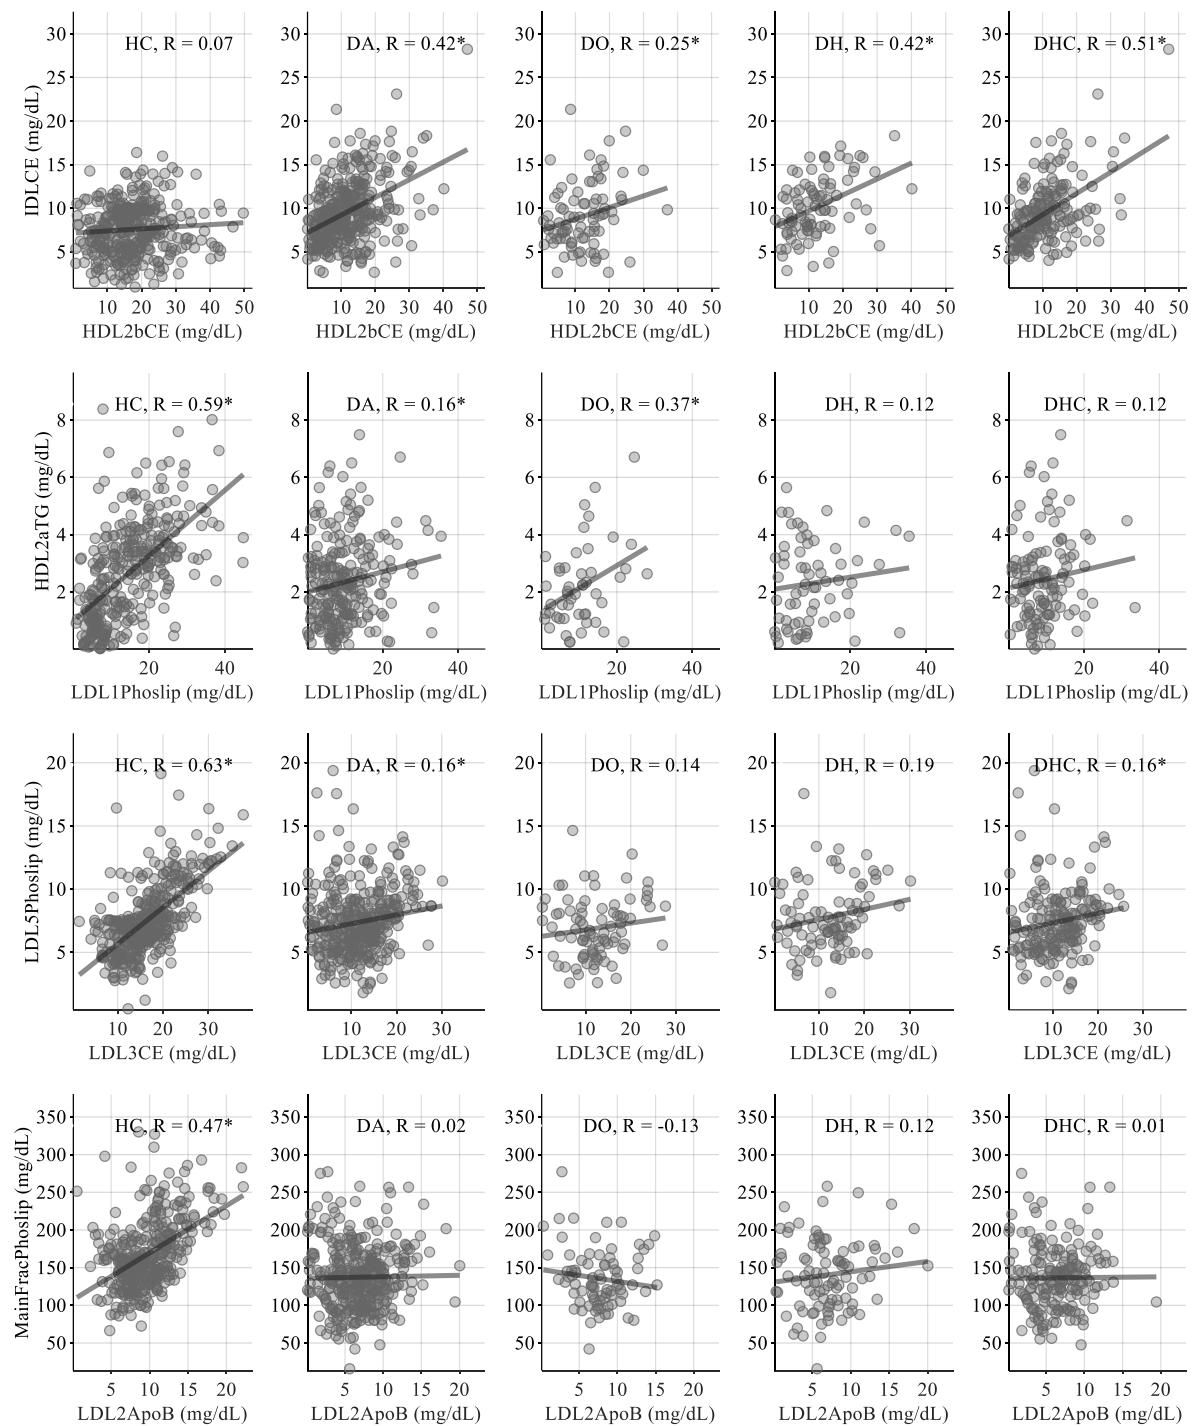

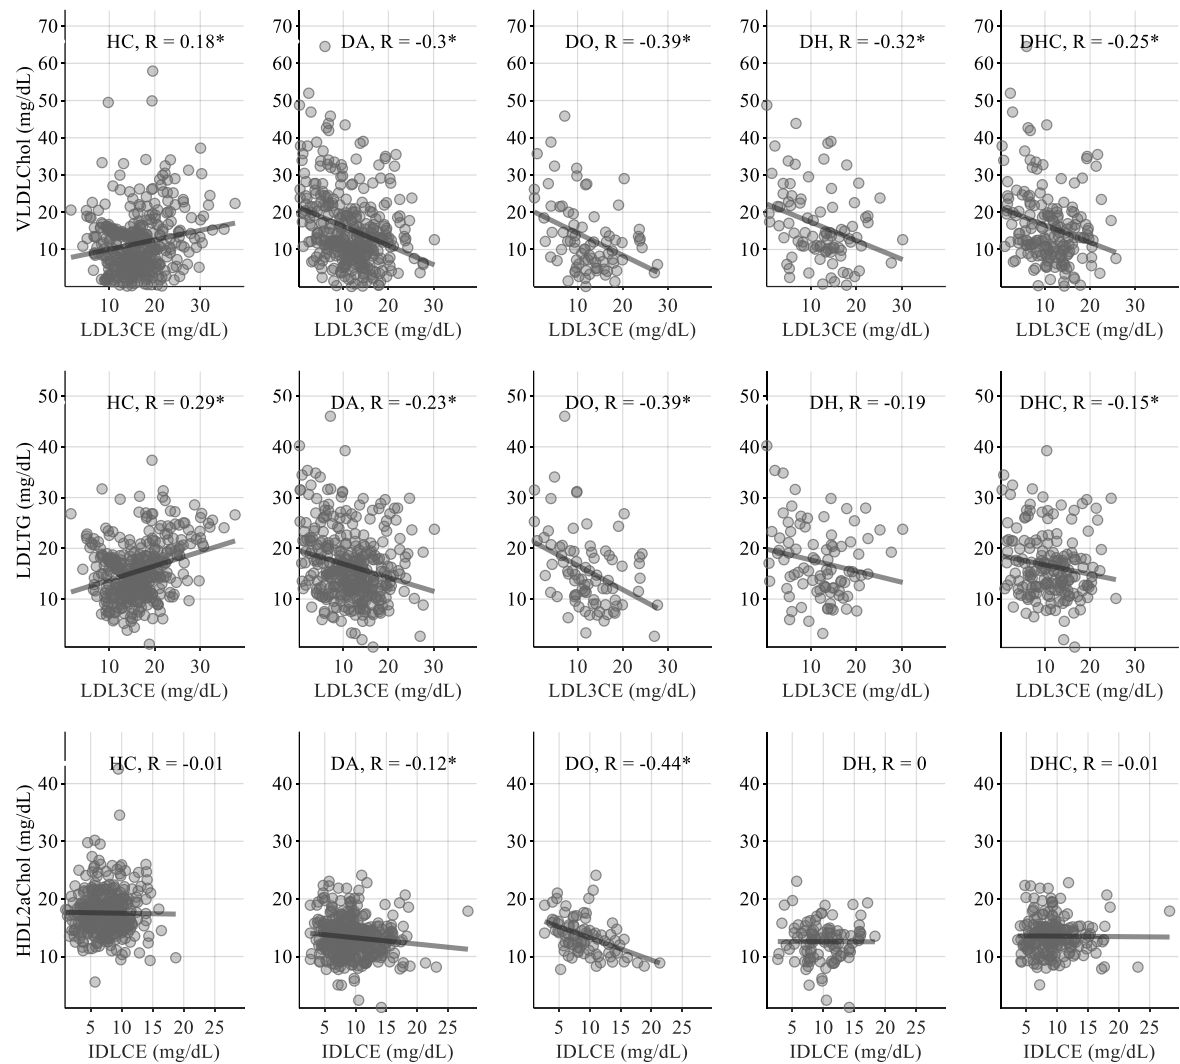

Supplement: Supplementary file 1 [file 6d6dc293229280ef8a1770a9.pdf]
